# Supplementary material for: Fabrication of agarose/fish gelatin double-network hydrogels with high strength and toughness for the development of artificial beef tendons
Source: Royal Society of Chemistry journal article supplement (doi:10.1039/d2fo00754a), 2022-01-01
Supplement: d2fo00754a1.pdf [file d2fo00754a1.pdf]

### Supplementary information

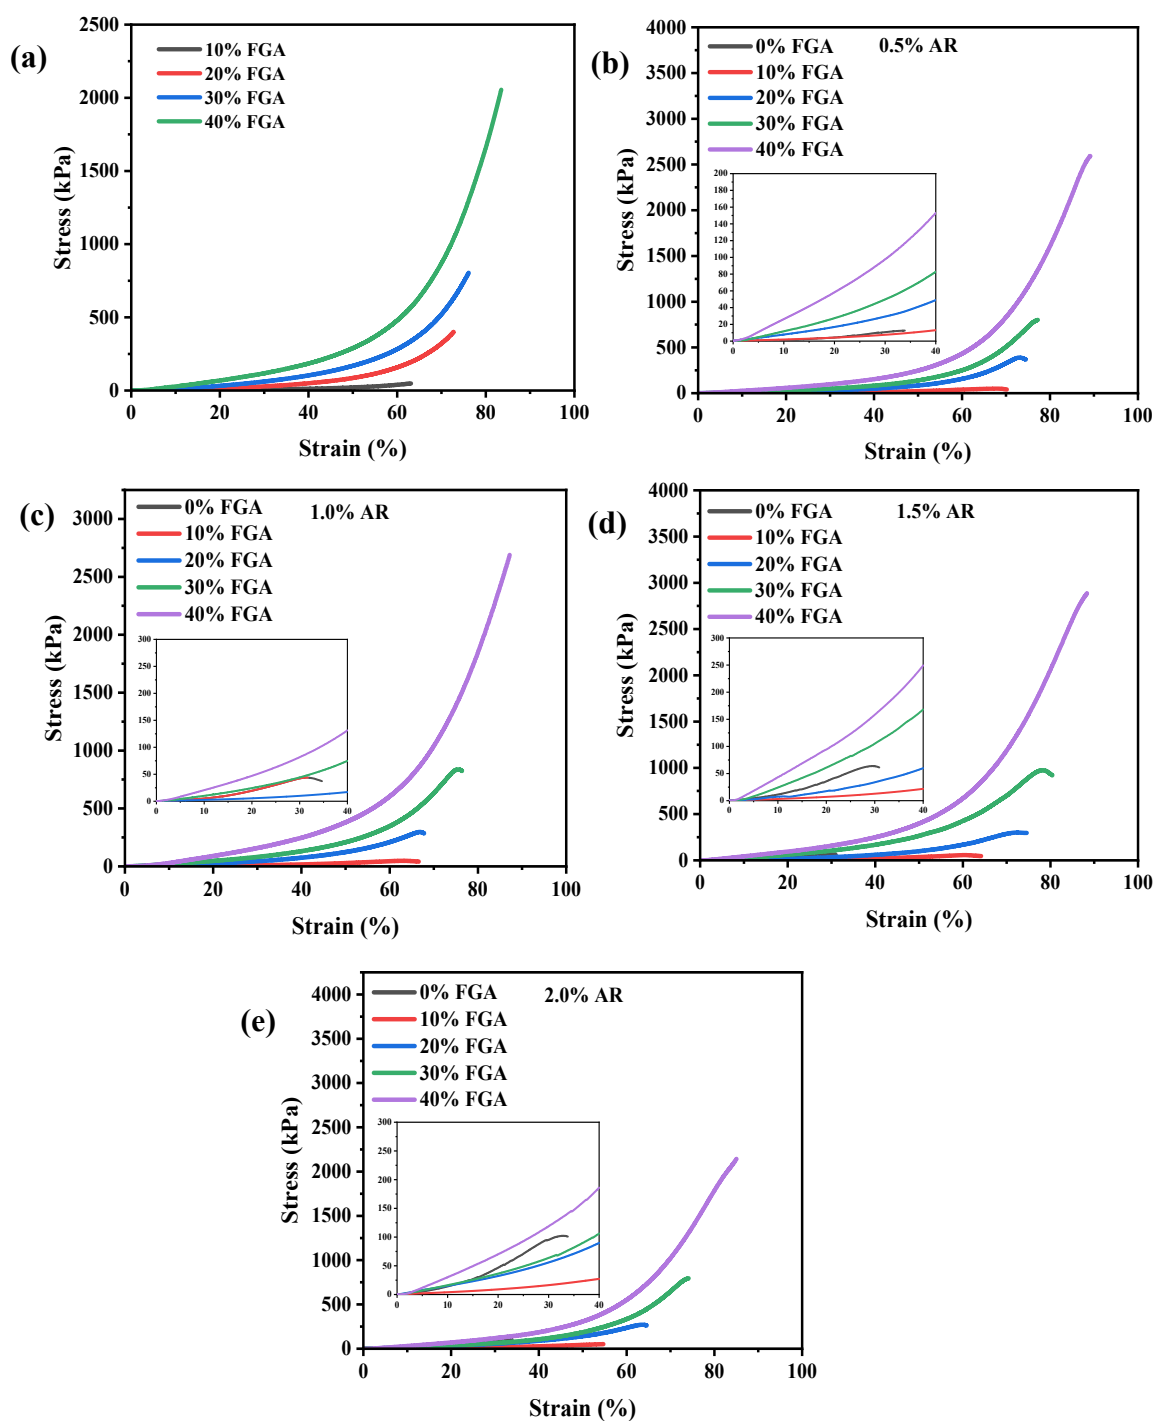

Supplementary Figure 1. Compressive stress-strain trend chart of (a) (10-40 wt%) FGA SNs, (b) 0.5 wt% AR/ (0-40 wt%) FGA gels, (c) 1.0 wt% AR/ (0-40 wt%) FGA gels, (d) 1.5 wt% AR/ (0-40 wt%) FGA gels, (e) 2.0 wt% AR/ (0-40 wt%) FGA gels.

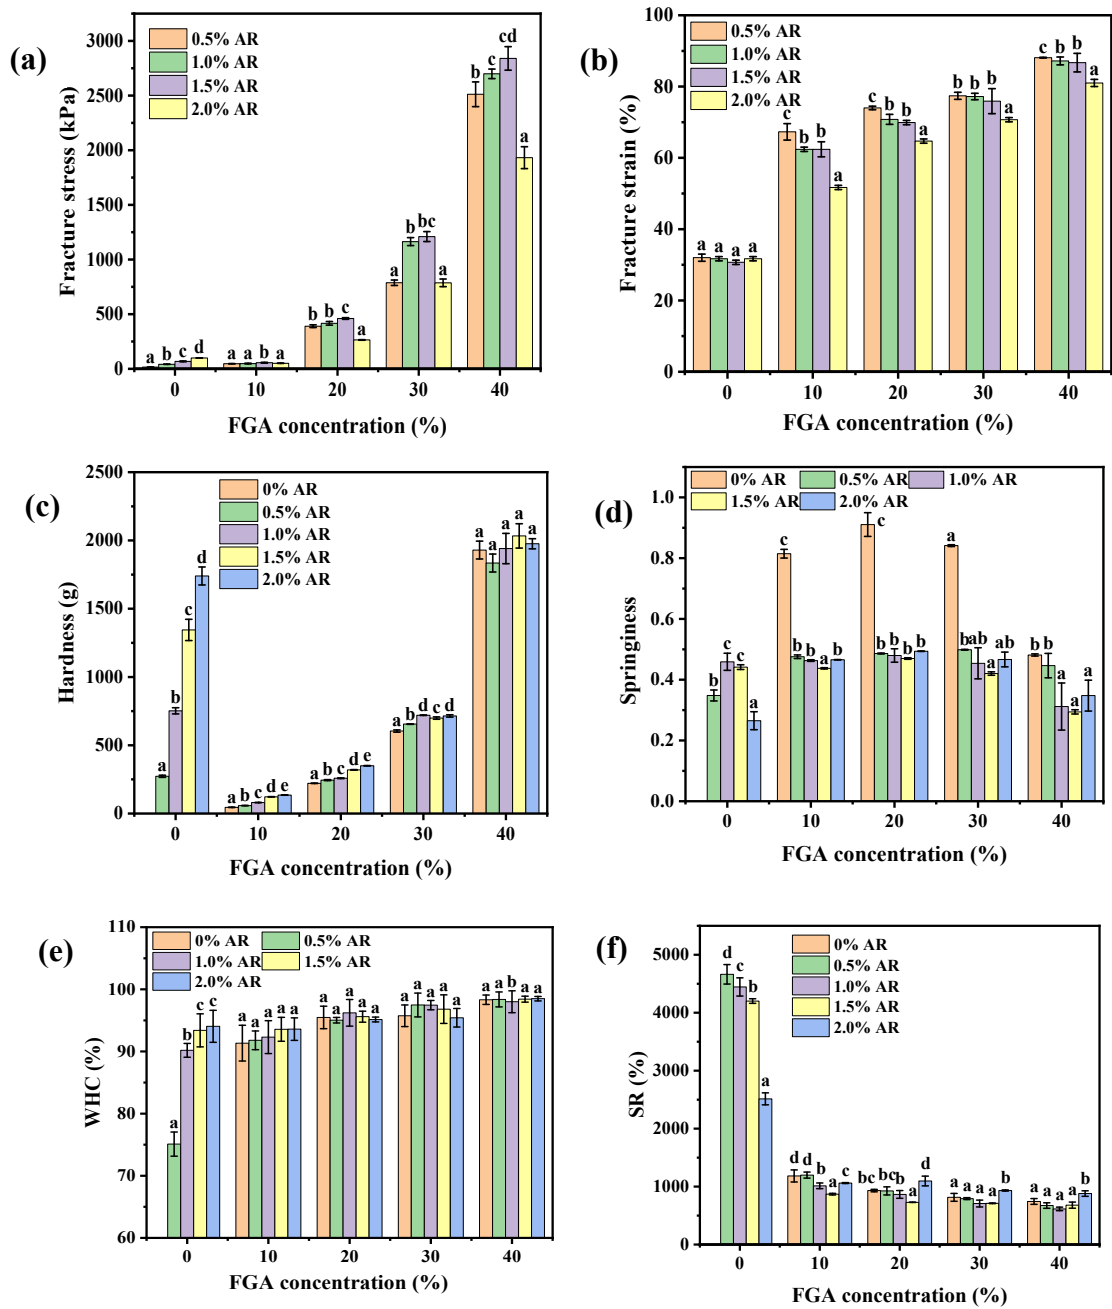

Supplementary Figure 2. (a) Compressive fracture stress, (b) fracture strain, (c) hardness, (d) springiness, (e) WHC, (f) SR of hydrogel samples containing (0-40 wt%) FGA and (0-2 wt%) AR.

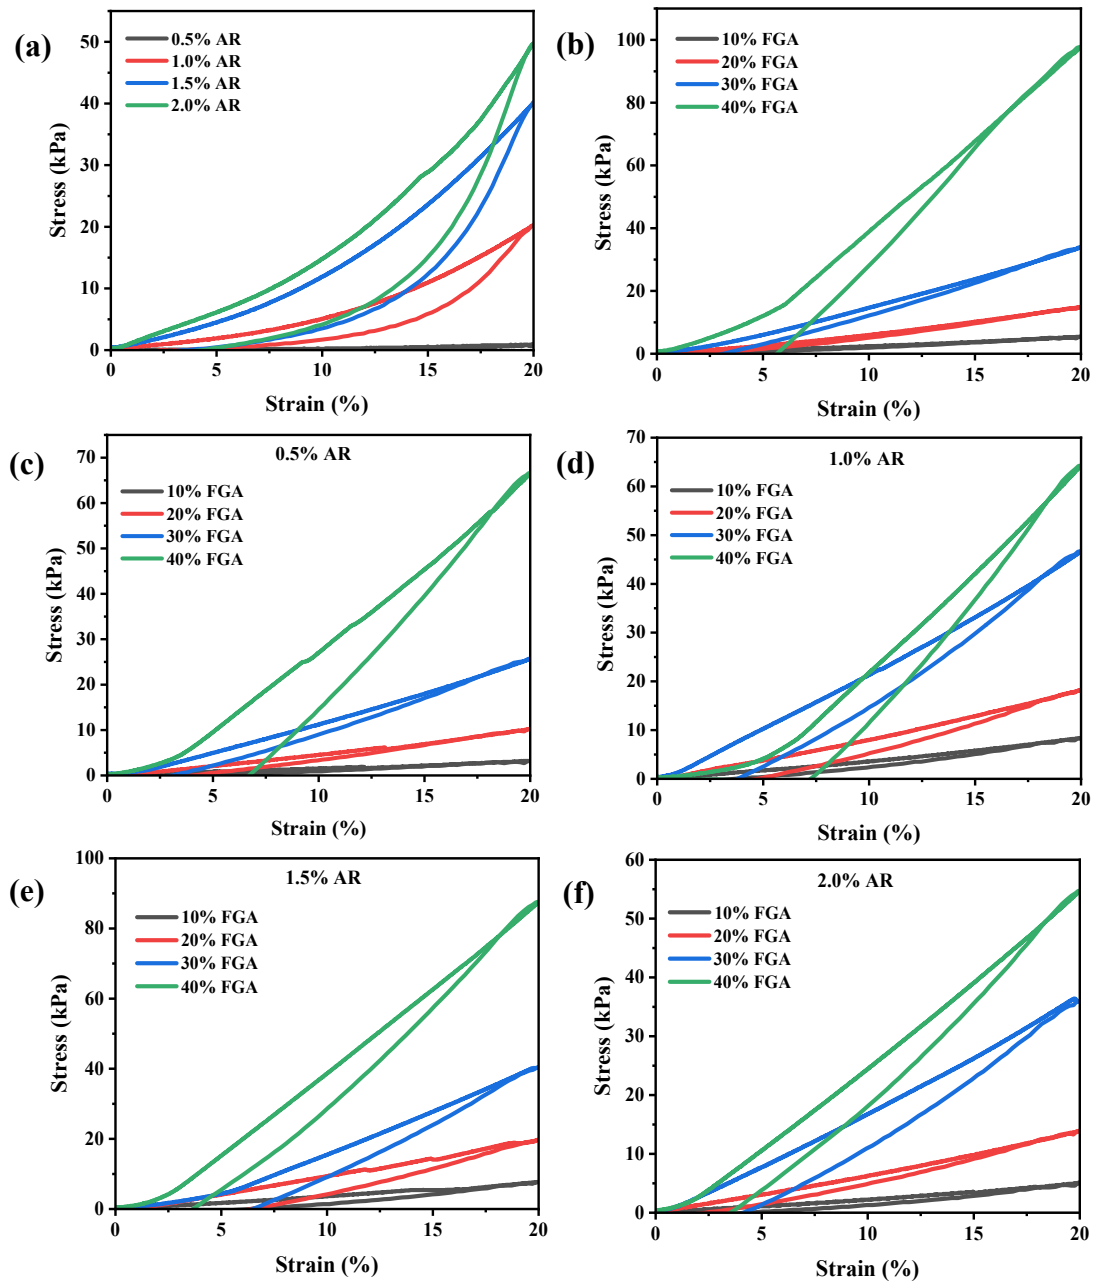

Supplementary Figure 3. Compressive loading-unloading chart of (a) (0.5-2 wt%) AR SNs, (b) (10-40 wt%) FGA SNs, (c) 0.5 wt% AR/ (10-40 wt%) FGA DN, (d) 1.0 wt% AR/ (10-40 wt%) FGA DN, (e) 1.5 wt% AR/ (10-40 wt%) FGA DN, (f) 2.0 wt% AR/ (10-40 wt%) FGA DN.

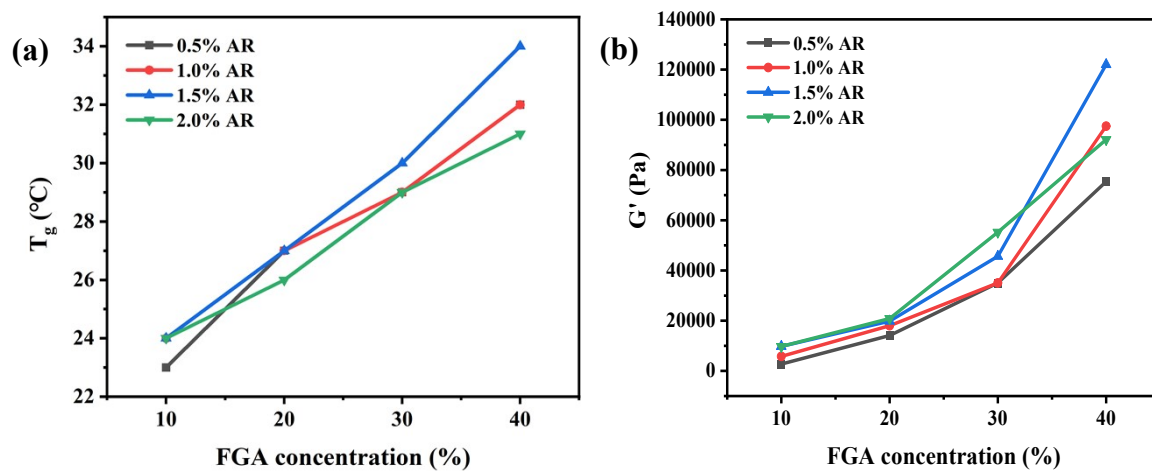

Supplementary Figure 4. (a)  $T_g$  and (b)  $G'$  at 15 °C of (0.5-2 wt%) AR/ (10-40 wt% FGA) DNAs.

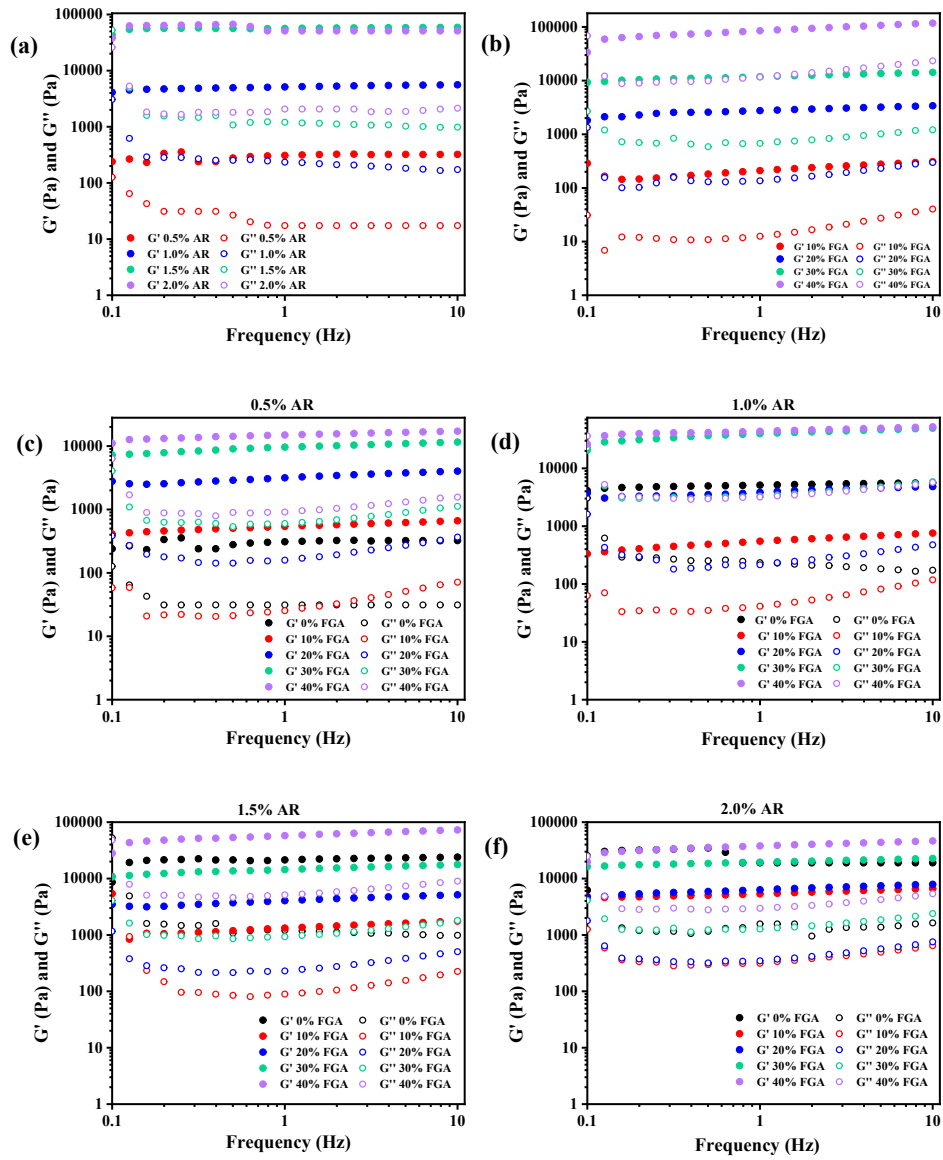

Supplementary Figure 5.  $G'$  and  $G''$  of frequency sweep measurement of (a) (0.5-2 wt%) AR SNs, (b) (10-40 wt%) FGA SNs, (c) 0.5 wt% AR/(10-40 wt%) FGA DNs, (d) 1.0 wt% AR/(10-40 wt%) FGA DNs, (e) 1.5 wt% AR/(10-40 wt%) FGA DNs, (f) 2.0 wt% AR/ (10-40 wt%) FGA DNs.

Supplementary Table 1 Total variance explained

| Principal component number | Eigenvalue | Percentage of Variance (%) | Cumulative (%) |
|----------------------------|------------|----------------------------|----------------|
| 1                          | 3.23873    | 53.97882                   | 53.97882       |
| 2                          | 1.76716    | 29.45272                   | 83.43154       |
| 3                          | 0.48562    | 8.0937                     | 91.52523       |
| 4                          | 0.40685    | 6.78085                    | 98.30609       |
| 5                          | 0.07266    | 1.211                      | 99.51708       |
| 6                          | 0.02898    | 0.48292                    | 100            |
